# Supplementary material for: Process evaluation protocol for the I-WOTCH study: an opioid tapering support programme for people with chronic non-malignant pain
Source: PubMed Central journal article supplement (PMC6797361; doi:10.1136/bmjopen-2019-028998), 2019-10-10
Supplement: bmjopen-2019-028998supp002.pdf [file bmjopen-2019-028998supp002.pdf]

**DAY 1 I-WOTCH Fidelity checklists**

Group ID:

Date of group session:

| <b>Day 1: Living with and dealing with pain</b>                                                 | <b>Date listened</b> | <b>Occurred/ Did not</b> | <b>Adherence score</b> | <b>Competence score</b> | <b>Comments</b> |
|-------------------------------------------------------------------------------------------------|----------------------|--------------------------|------------------------|-------------------------|-----------------|
| Session 1 Introduction 15mins                                                                   |                      |                          |                        |                         |                 |
| <b>*Session 2<br/>Pain information approx. 45mins</b>                                           |                      |                          |                        |                         |                 |
| <b>*Session 3<br/>Painkiller information and opioid education approx. 45mins</b>                |                      |                          |                        |                         |                 |
| Break                                                                                           |                      |                          |                        |                         |                 |
| <b>*Session 4<br/>Acceptance: John's story 20mins</b>                                           |                      |                          |                        |                         |                 |
| Session 5 Attention control and distraction 10mins                                              |                      |                          |                        |                         |                 |
| Session 6 Distraction activity – rose drawing 20mins                                            |                      |                          |                        |                         |                 |
| Lunch                                                                                           |                      |                          |                        |                         |                 |
| <b>*Session 7<br/>Good days, Bad days when is pain bearable and when is it not? 40mins</b>      |                      |                          |                        |                         |                 |
| <b>*Session 8<br/>The pain cycle unhelpful emotions and behaviours 40mins</b>                   |                      |                          |                        |                         |                 |
| Break                                                                                           |                      |                          |                        |                         |                 |
| Session 9 Posture                                                                               |                      |                          |                        |                         |                 |
| Session 10 Relaxation and Breathing                                                             |                      |                          |                        |                         |                 |
| Session 11 Summary of the day                                                                   |                      |                          |                        |                         |                 |
| <b>Total scores</b>                                                                             |                      |                          |                        |                         |                 |
| Comments: <i>e.g. session not recorded so subsequent group same session listened to instead</i> |                      |                          |                        |                         |                 |
